# Supplementary material for: Bioactive Phenolic Compounds from Peperomia obtusifolia
Source: MDPI journal article supplement (doi:10.3390/molecules27144363), 2022-07-07
Supplement: s1 [file s1]

# Supporting Information

## Bioactive phenolic compounds from *Peperomia obtusifolia*

Ismail Ware<sup>1,2</sup>, Katrin Franke<sup>1\*</sup>, Hidayat Hussain<sup>1</sup>, Ibrahim Morgan<sup>1</sup>, Robert Rennert<sup>1</sup>, Ludger A. Wessjohann<sup>1\*</sup>

<sup>1</sup> Department of Bioorganic Chemistry, Leibniz Institute of Plant Biochemistry, D-06120 Halle (Saale), Germany; [IsmailBin.Ware@ipb-halle.de](mailto:IsmailBin.Ware@ipb-halle.de) (I.W.); [Katrin.Franke@ipb-halle.de](mailto:Katrin.Franke@ipb-halle.de) (K.F.); [Hidayat.Hussain@ipb-halle.de](mailto:Hidayat.Hussain@ipb-halle.de) (H.H.); [Ibrahim.Morgan@ipb-halle.de](mailto:Ibrahim.Morgan@ipb-halle.de) (I.M.); [Robert.Rennert@ipb-halle.de](mailto:Robert.Rennert@ipb-halle.de) (R.R.); [Ludger.Wessjohann@ipb-halle.de](mailto:Ludger.Wessjohann@ipb-halle.de) (L.A.W.)

<sup>2</sup> Institute of Bioproduct Development, Universiti Teknologi Malaysia, 81310 UTM, Johor Bahru, Johor, Malaysia.

\* Correspondence: [Katrin.Franke@ipb-halle.de](mailto:Katrin.Franke@ipb-halle.de) (K.F.); [wessjohann@ipb-halle.de](mailto:wessjohann@ipb-halle.de) (L.A.W.) Tel.: +49-345-5582-1380 (K.F.); +49-345-5582-1300 (L.A.W.)

### TABLE OF CONTENTS

### PAGE

|                                                                                                                                                    |    |
|----------------------------------------------------------------------------------------------------------------------------------------------------|----|
| Figure S1: <sup>1</sup> H NMR spectrum of compound <b>1</b> (400 MHz, MeOH- <i>d</i> <sub>4</sub> ).....                                           | 2  |
| Figure S2: <sup>13</sup> C NMR spectrum of compound <b>1</b> (100 MHz, MeOH- <i>d</i> <sub>4</sub> ).....                                          | 2  |
| Figure S3: HSQC spectrum of compound <b>1</b> (400 MHz, MeOH- <i>d</i> <sub>4</sub> ). ....                                                        | 3  |
| Figure S4: HMBC spectrum of compound <b>1</b> (400 MHz, MeOH- <i>d</i> <sub>4</sub> ). ....                                                        | 3  |
| Figure S5: <sup>1</sup> H- <sup>1</sup> H COSY spectrum of compound <b>1</b> (400 MHz, MeOH- <i>d</i> <sub>4</sub> ).....                          | 4  |
| Figure S6: UV spectrum of compound <b>1</b> in MeOH. ....                                                                                          | 5  |
| Figure S7: IR spectrum of compound <b>1</b> in MeOH. ....                                                                                          | 5  |
| Figure S8: ESI-HRMS spectrum of compound <b>1</b> in negative ion mode. ....                                                                       | 6  |
| Figure S9: HRMS spectrum from ethanol extract of <i>P. obtusifolia</i> with selected molecular ion of <i>m/z</i> 395.0979 [M-H] <sup>-</sup> ..... | 6  |
| Table S1: Polarimeter data of compound <b>1</b> .....                                                                                              | 7  |
| Figure S10: <sup>1</sup> H NMR spectrum of compound <b>2</b> (400 MHz, MeOH- <i>d</i> <sub>4</sub> ).....                                          | 8  |
| Figure S11: <sup>13</sup> C NMR spectrum of compound <b>2</b> (100 MHz, MeOH- <i>d</i> <sub>4</sub> ).....                                         | 8  |
| Figure S12: DEPT135 spectrum of compound <b>2</b> (100 MHz, MeOH- <i>d</i> <sub>4</sub> ). ....                                                    | 9  |
| Figure S13: HSQC spectrum of compound <b>2</b> (400 MHz, MeOH- <i>d</i> <sub>4</sub> ). ....                                                       | 9  |
| Figure S14: HMBC spectrum of compound <b>2</b> (400 MHz, MeOH- <i>d</i> <sub>4</sub> ). ....                                                       | 10 |
| Figure S15: <sup>1</sup> H- <sup>1</sup> H COSY spectrum of compound <b>2</b> (400 MHz, MeOH- <i>d</i> <sub>4</sub> ).....                         | 10 |
| Figure S16: 1D-ROESY spectrum of compound <b>2</b> (400 MHz, MeOH- <i>d</i> <sub>4</sub> ). ....                                                   | 11 |
| Figure S17: UV spectrum of compound <b>2</b> in MeOH. ....                                                                                         | 11 |
| Figure S18: IR spectrum of compound <b>2</b> in MeOH. ....                                                                                         | 12 |
| Figure S19: ESI-HRMS spectrum of compound <b>2</b> in negative ion mode.....                                                                       | 12 |
| Figure S20: Isolation scheme for compounds <b>1-7</b> .....                                                                                        | 12 |

Trimethyl (1*S*,2*R*)-1-(((*E*)-3-(3,4-dihydroxy phenyl)acryloyl)oxy)propane-1,2,3-tricarboxylate (peperomic ester, **1**)

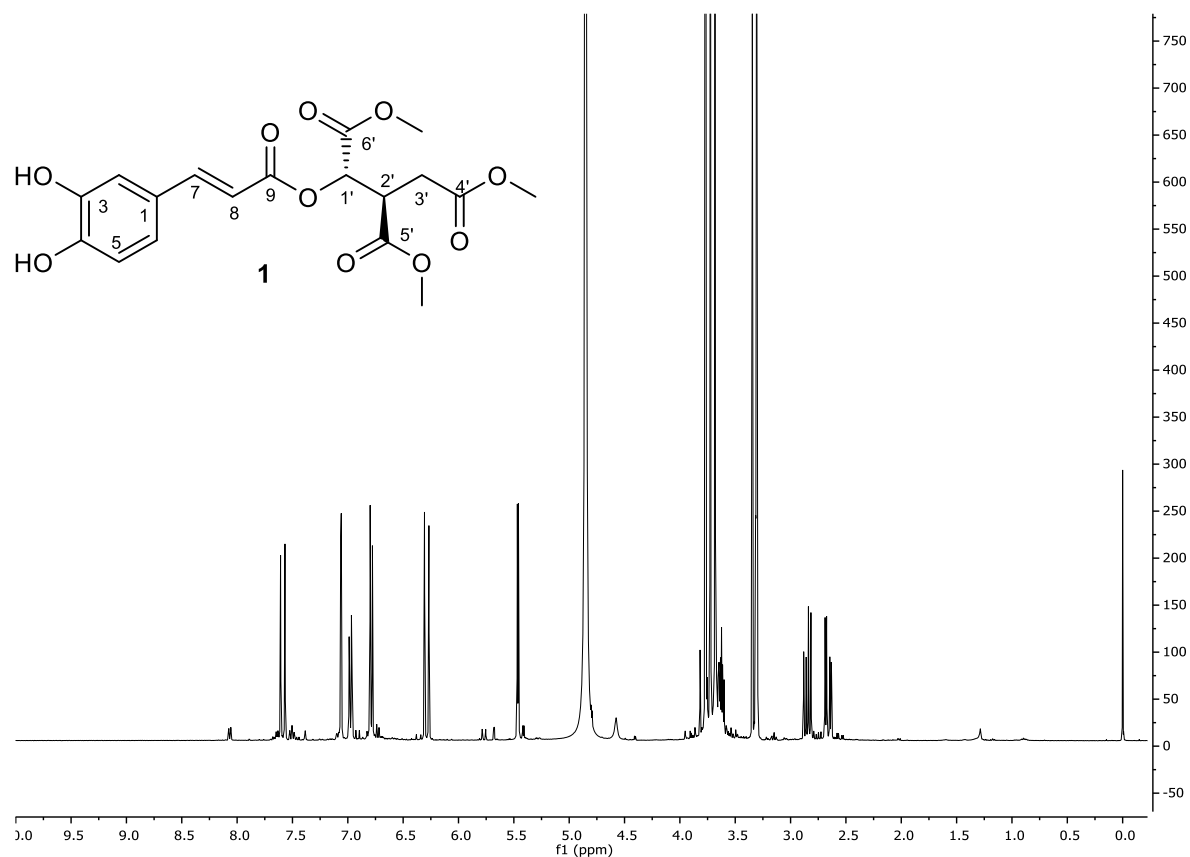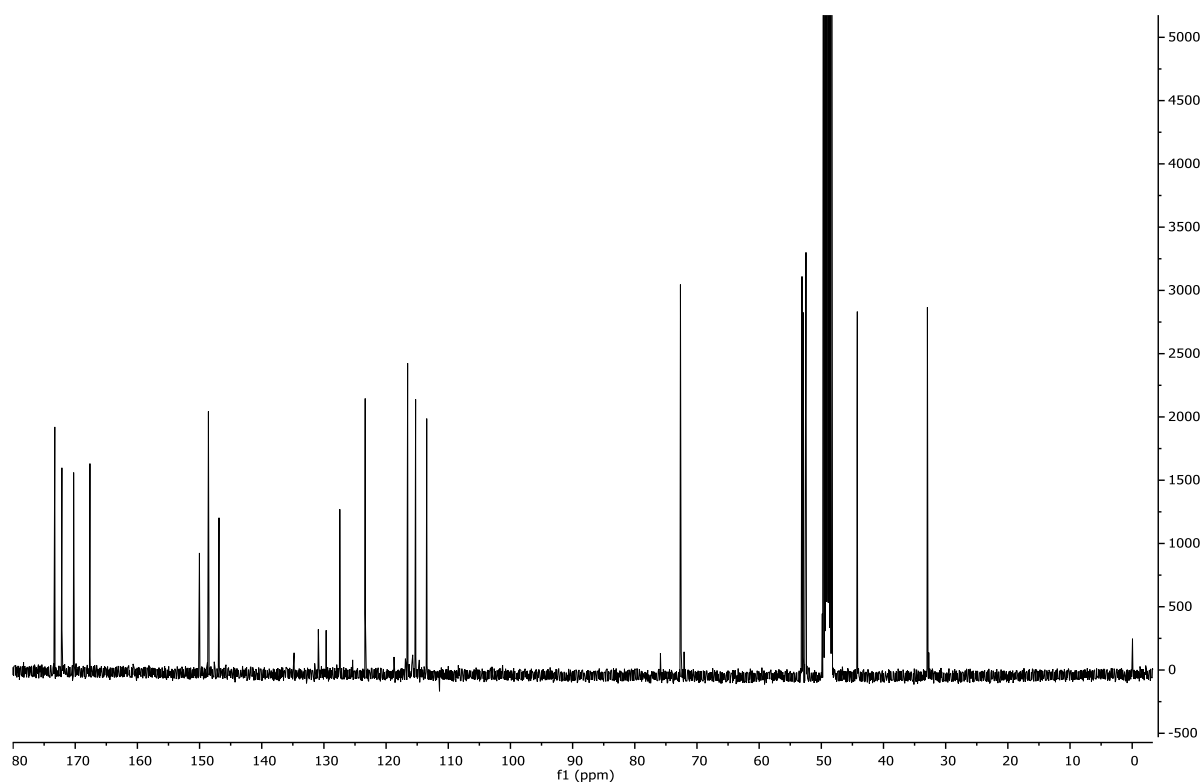

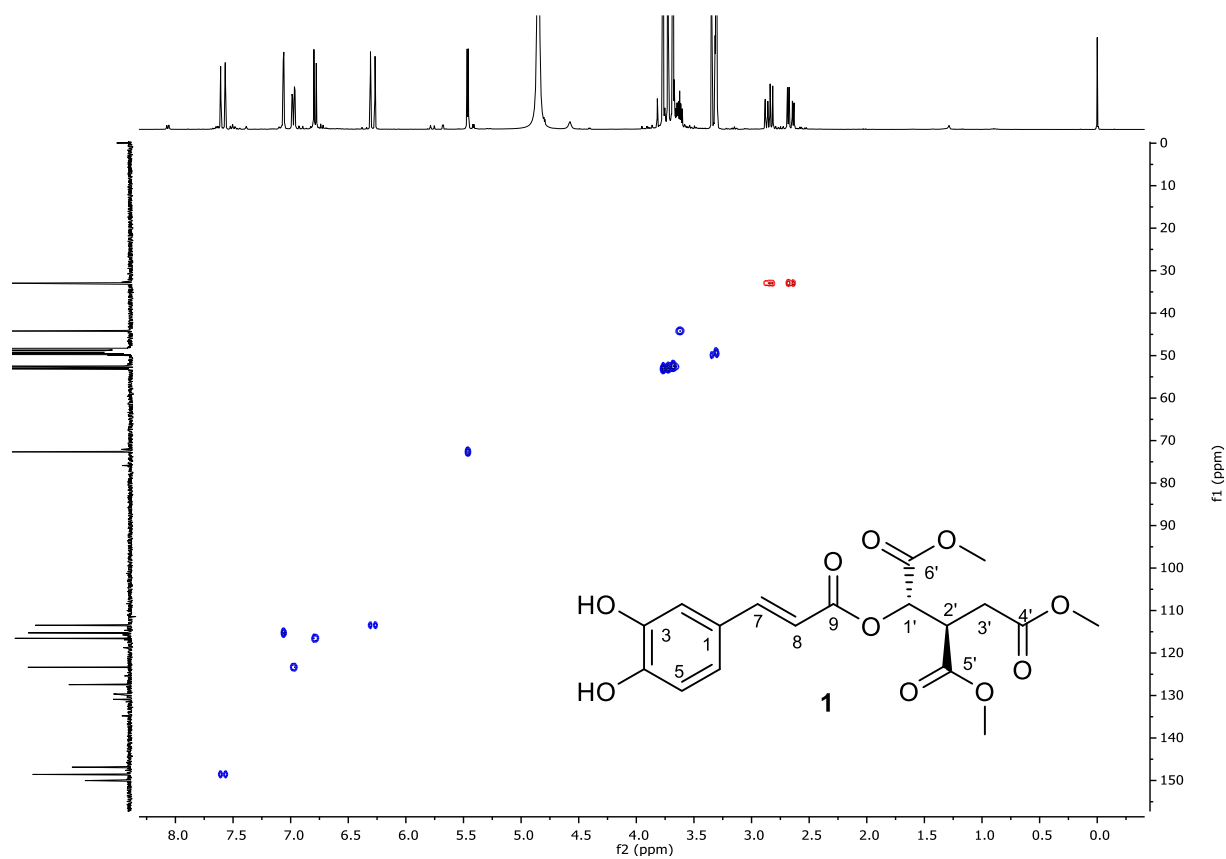

Figure S3: HSQC spectrum of compound **1** (400 MHz, MeOH-*d*<sub>4</sub>).

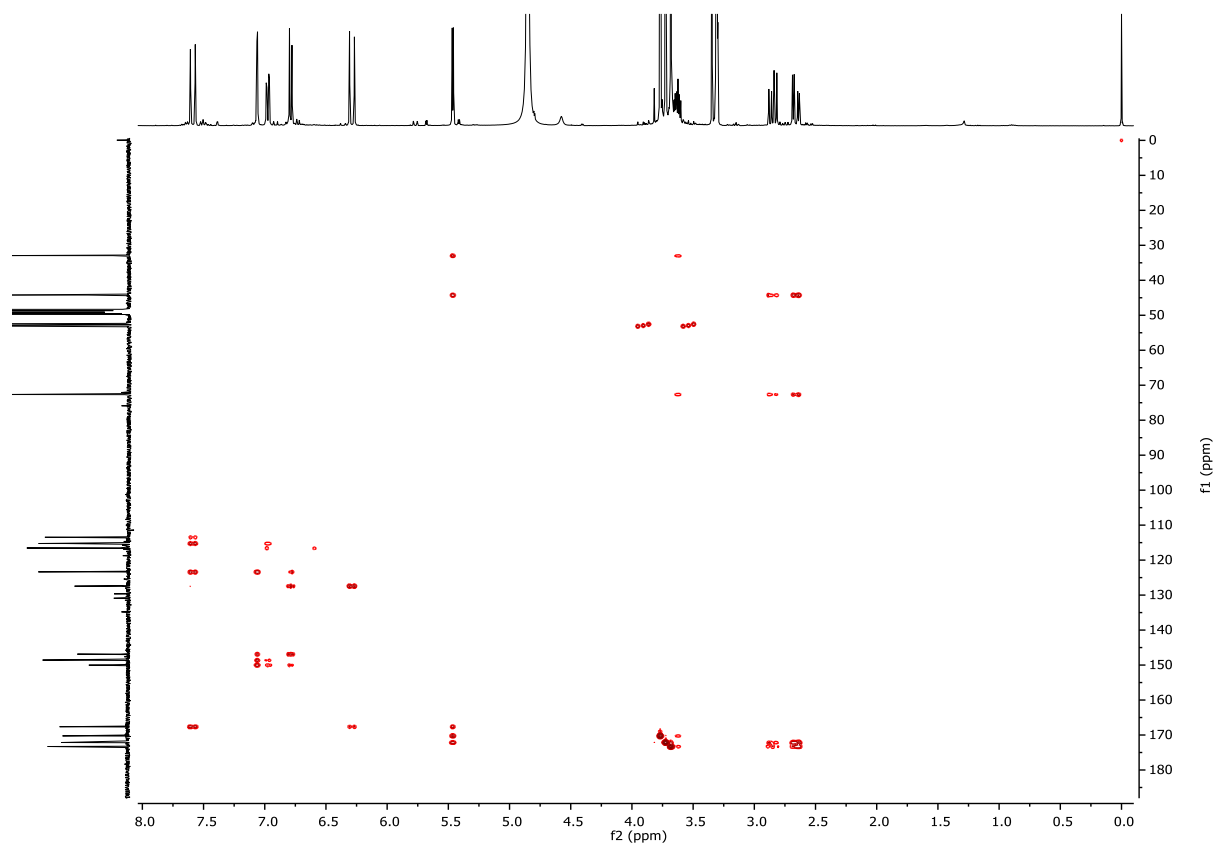

Figure S4: HMBC spectrum of compound **1** (400 MHz, MeOH-*d*<sub>4</sub>).

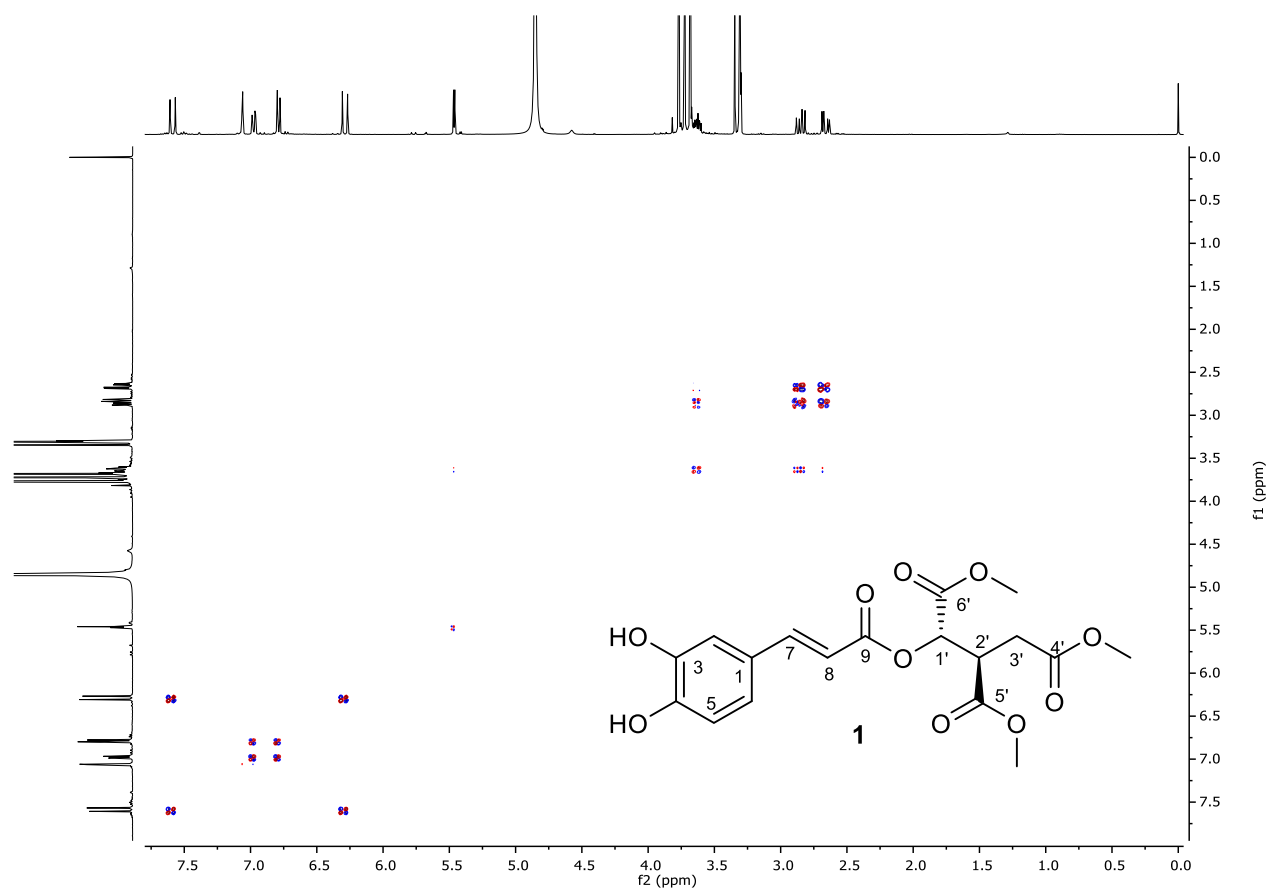

**Figure S5:**  $^1\text{H}$ - $^1\text{H}$  COSY spectrum of compound **1** (400 MHz,  $\text{MeOH-}d_4$ ).

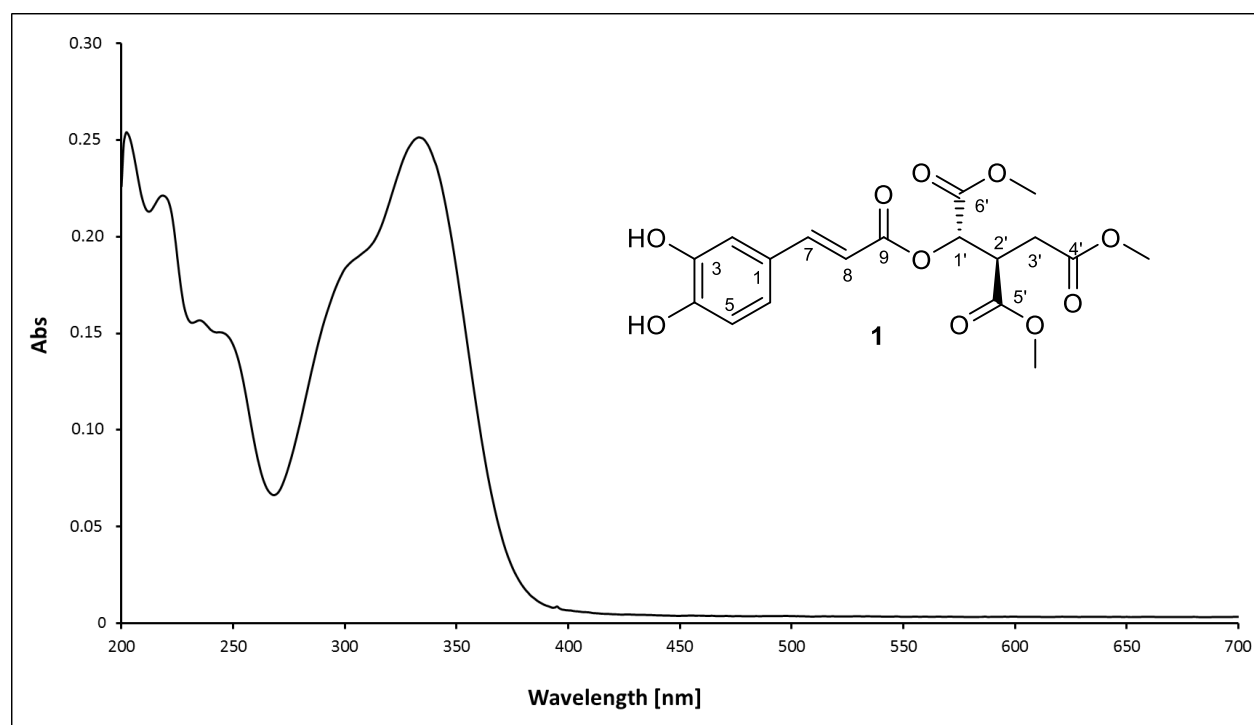

Figure S6: UV spectrum of compound **1** in MeOH.

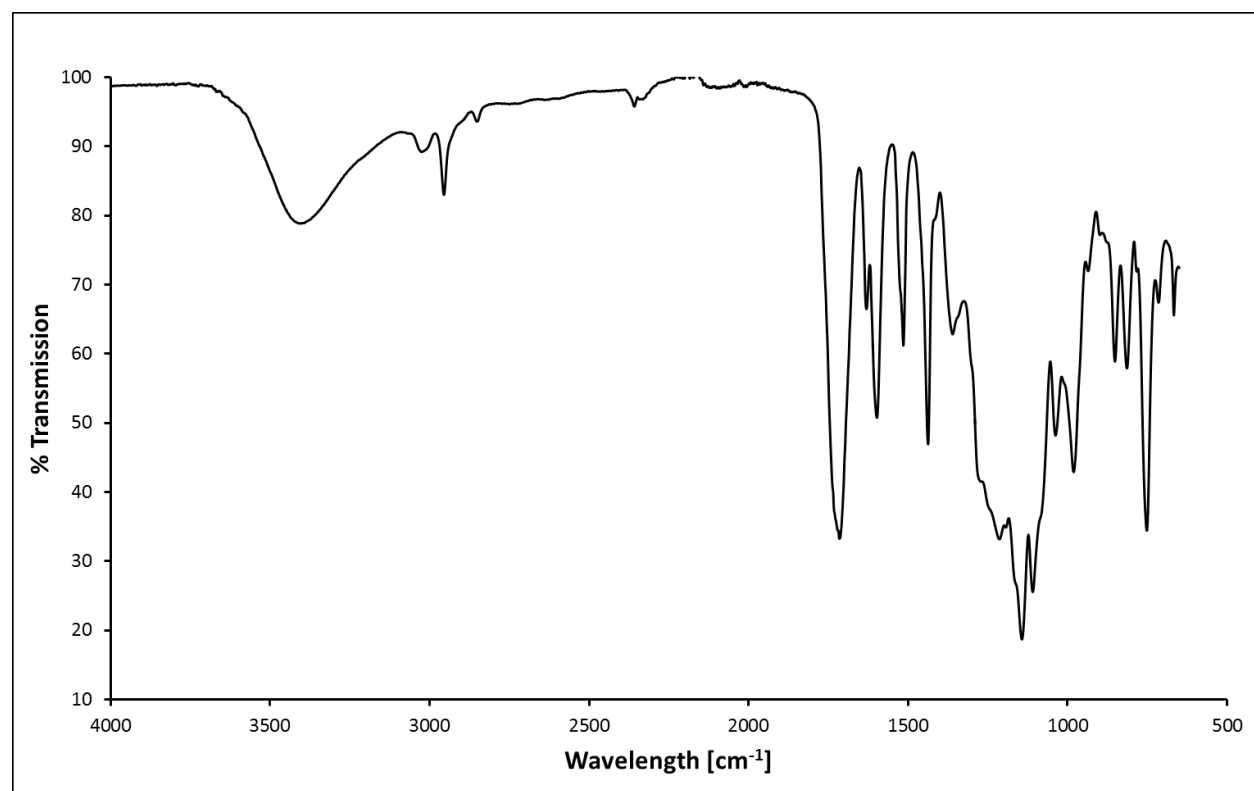

Figure S7: IR spectrum of compound **1** in MeOH.

ISW013\_f3d1\_neg #16 RT: 0.06 AV: 1 NL: 6.68E7  
T: FTMS - p ESI Full ms [110.00-2000.00]

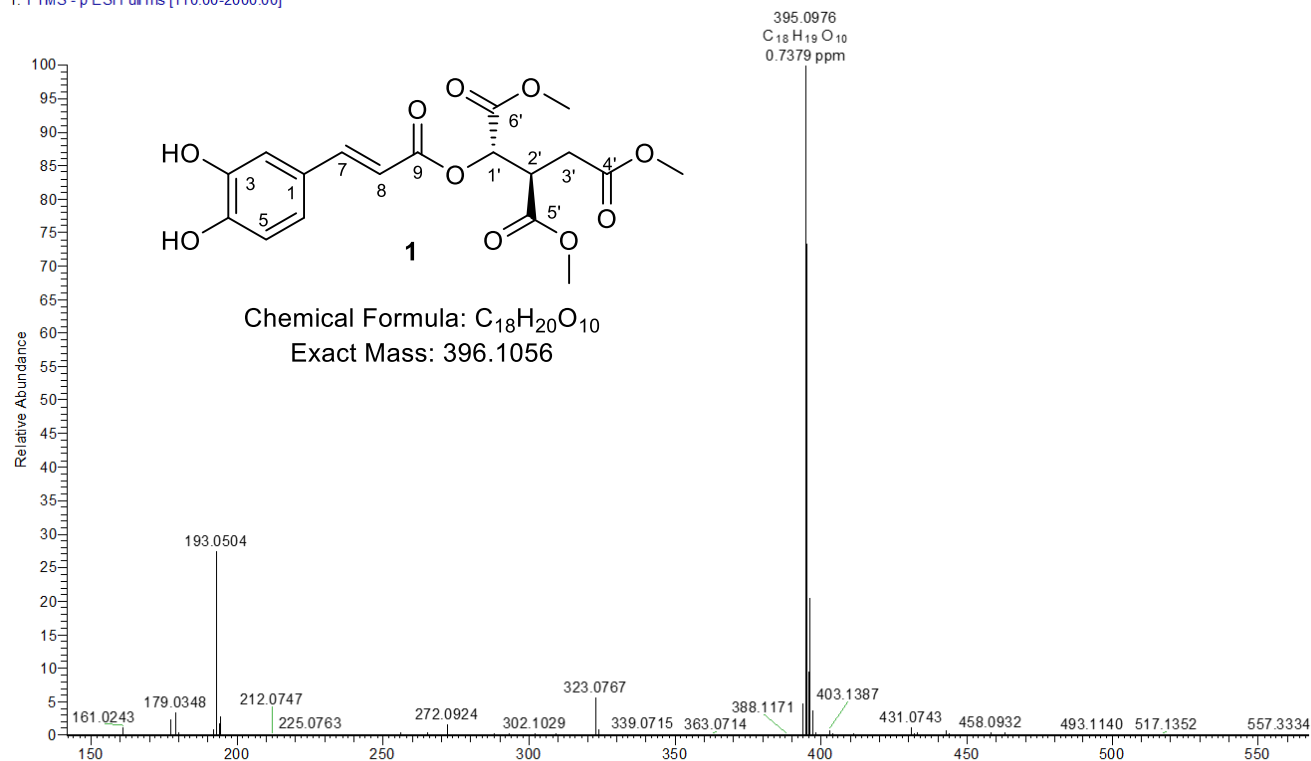

Figure S8: ESI-HRMS spectrum of compound 1 in negative ion mode.

Spectrum from 20210813\_ISW010\_MS2\_395\_neg.wiff (sample 1) - 20210813\_ISW010\_MS2\_395\_neg. Experiment 2, -TOF MS<sup>2</sup> (CE=-15) of 395.1 (50 - 500) from 5.776 min

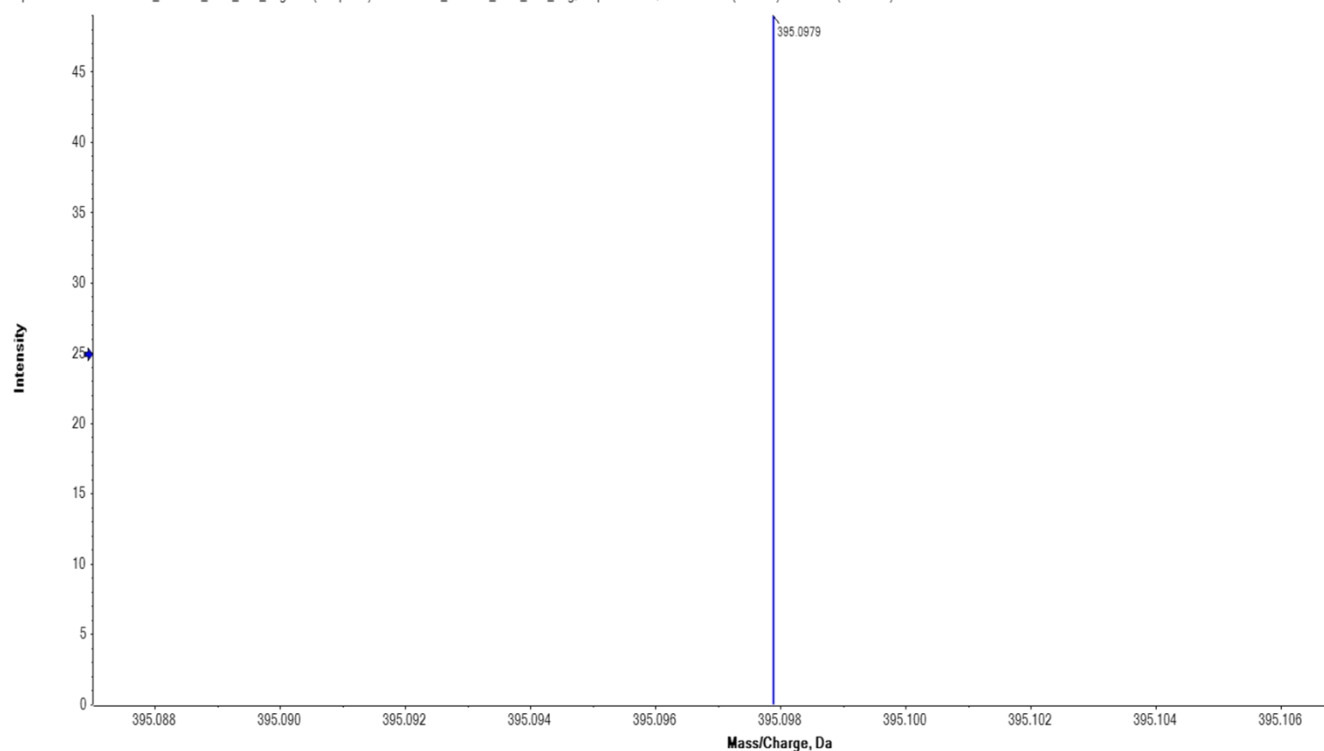

Figure S9: HRMS spectrum from ethanol extract of *P. obtusifolia* with selected molecular ion of  $m/z$  395.0979  $[M-H]^-$  (1).

**Table S1:** Polarimeter data of compound **1**.

|                         |                         |
|-------------------------|-------------------------|
| Light Source            | WI                      |
| Wavelength              | 589 nm                  |
| Sample Aperture         | Ø 3.0                   |
| Light Aperture          | Ø 1.0                   |
| D.I.T.                  | 5 sec                   |
| Cycle Times             | 20                      |
| Cycle Interval          | 5 sec                   |
| Path Length             | 100 mm                  |
| Concentration           | 0.1545 W/V%             |
| Factor                  | 1.0000                  |
| Temp. Correct           | 0                       |
| <b>Sample</b>           | <b>ISW013_f3d1</b>      |
| Comment                 | 3.09 mg / 2 ml Methanol |
| <b>Optical Rotation</b> |                         |
| Average                 | -0.0180 deg             |
| S.D.                    | 0.0004 deg              |
| R.S.D.                  | 2.2603 %                |
| <b>Specific O.R.</b>    |                         |
| Average                 | -11.6634                |
| S.D.                    | 0.2636                  |
| Temperatur              | 21.9° C                 |

N-[2-(3,4-dihydroxyphenyl)ethyl]-3,4-dihydroxybenzamide 4'-O- $\beta$ -D-glucoside (peperoside, **2**)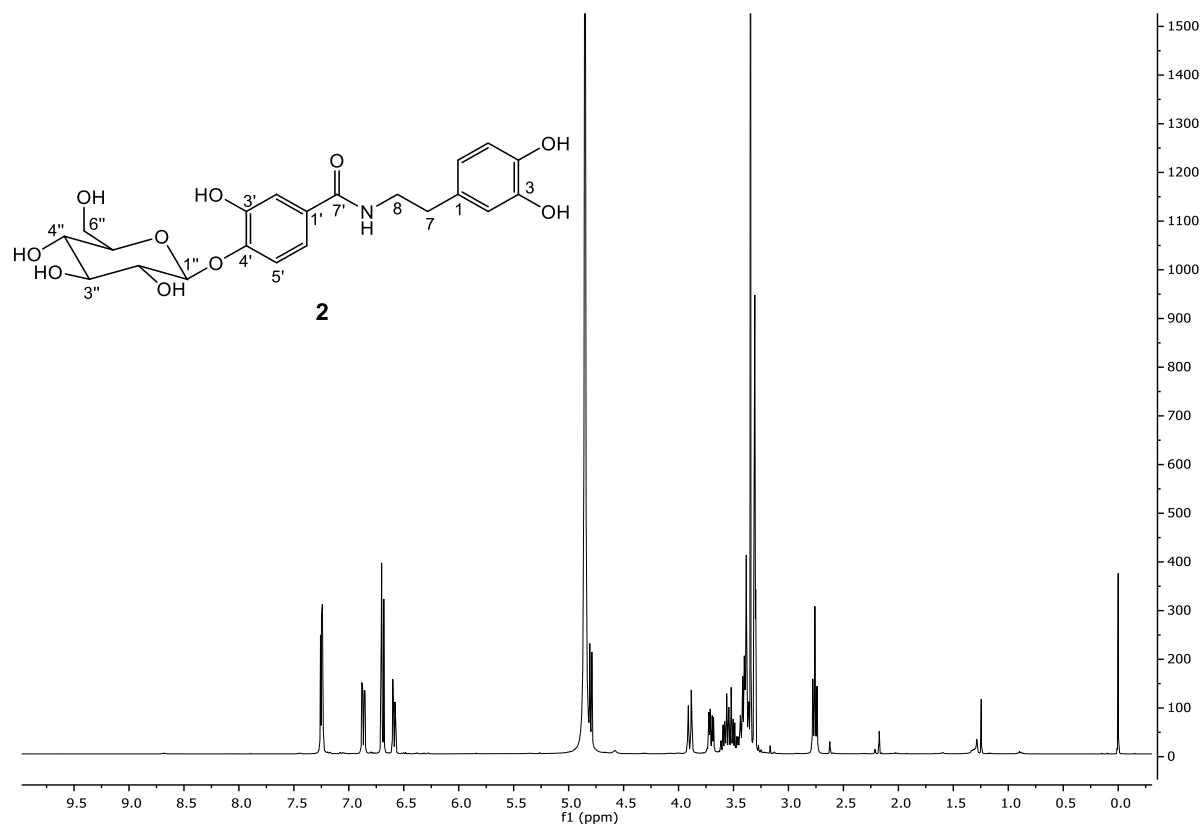

Figure S10:  $^1\text{H}$  NMR spectrum of compound **2** (400 MHz,  $\text{MeOH-}d_4$ ).

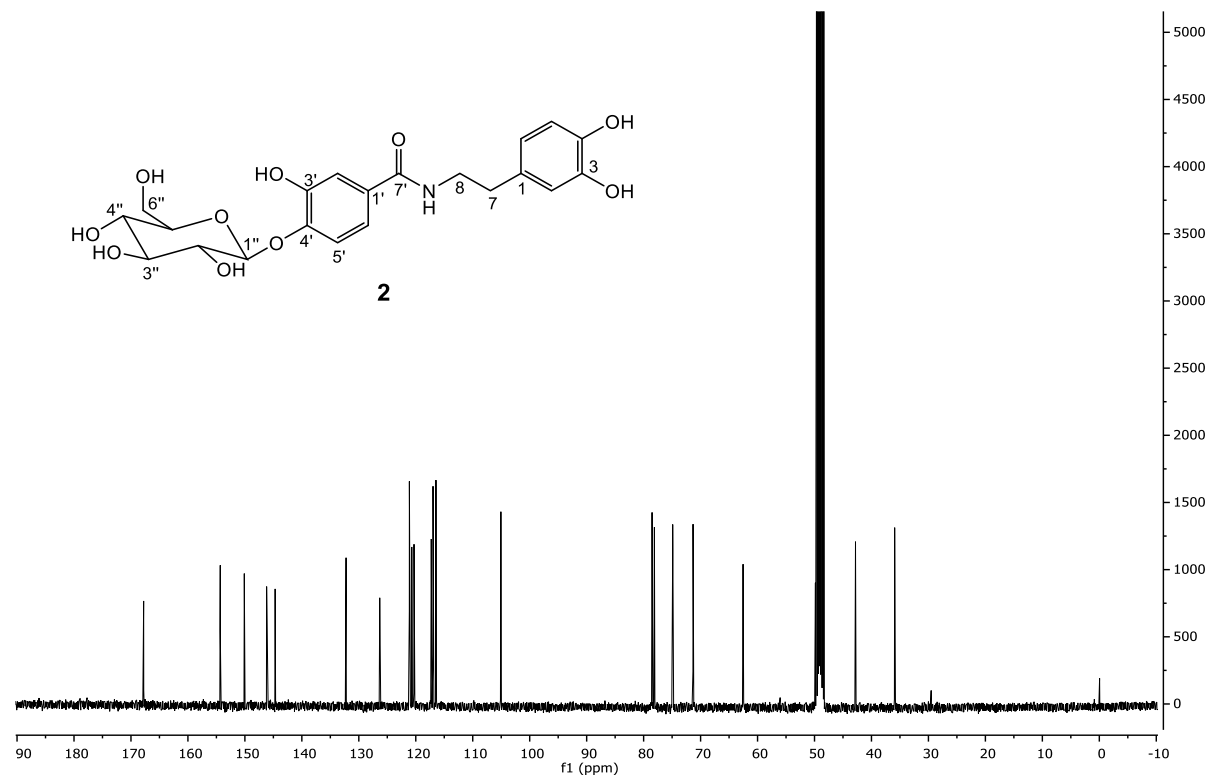

Figure S11:  $^{13}\text{C}$  NMR spectrum of compound **2** (100 MHz,  $\text{MeOH-}d_4$ ).



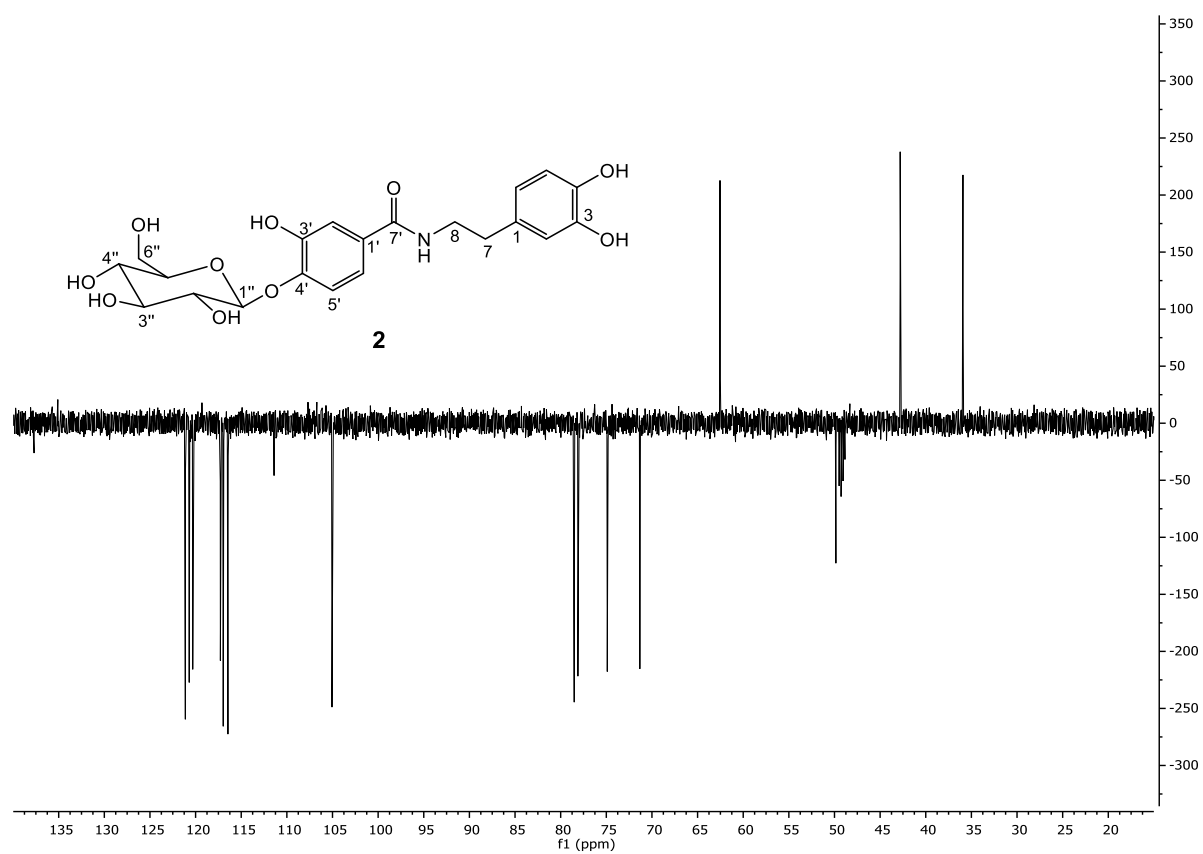

Figure S12: DEPT135 spectrum of compound **2** (100 MHz, MeOH-*d*<sub>4</sub>).

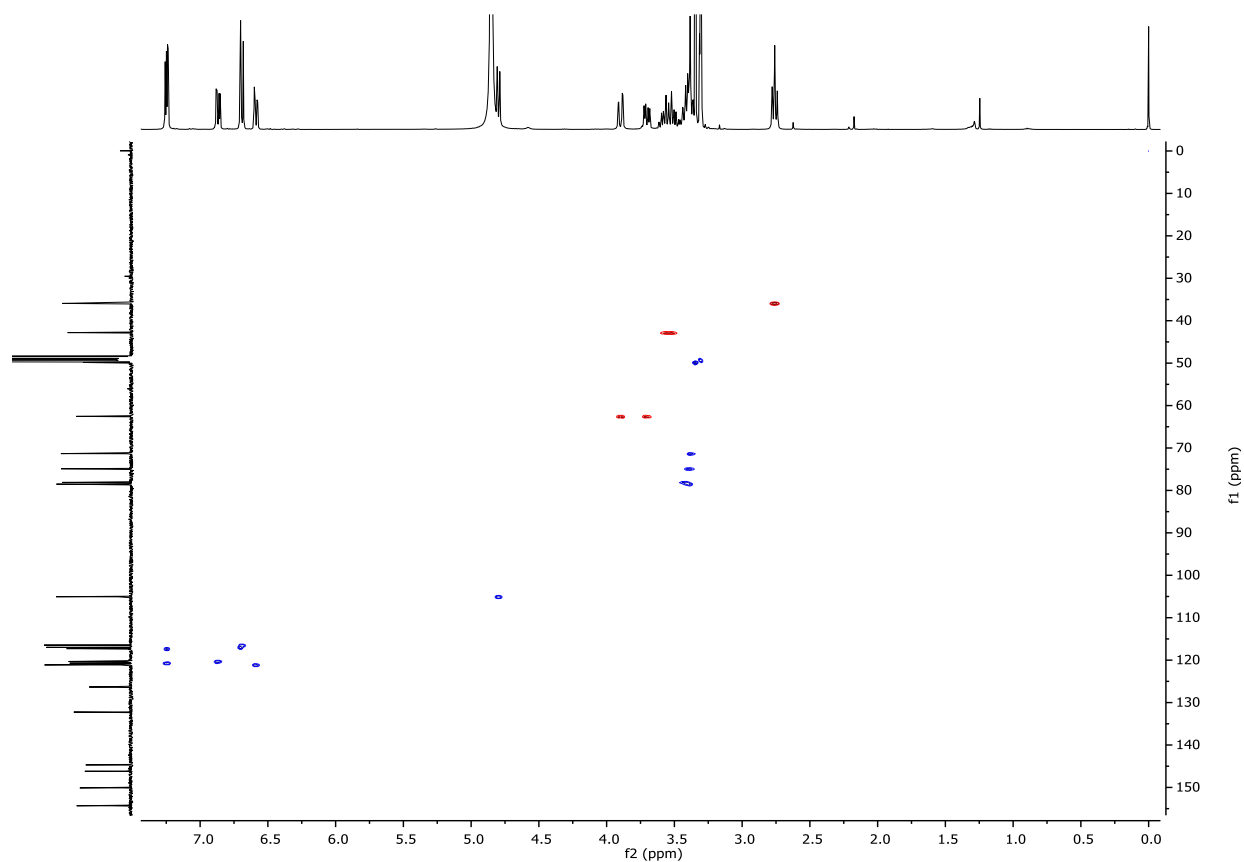

Figure S13: HSQC spectrum of compound **2** (400 MHz, MeOH-*d*<sub>4</sub>).

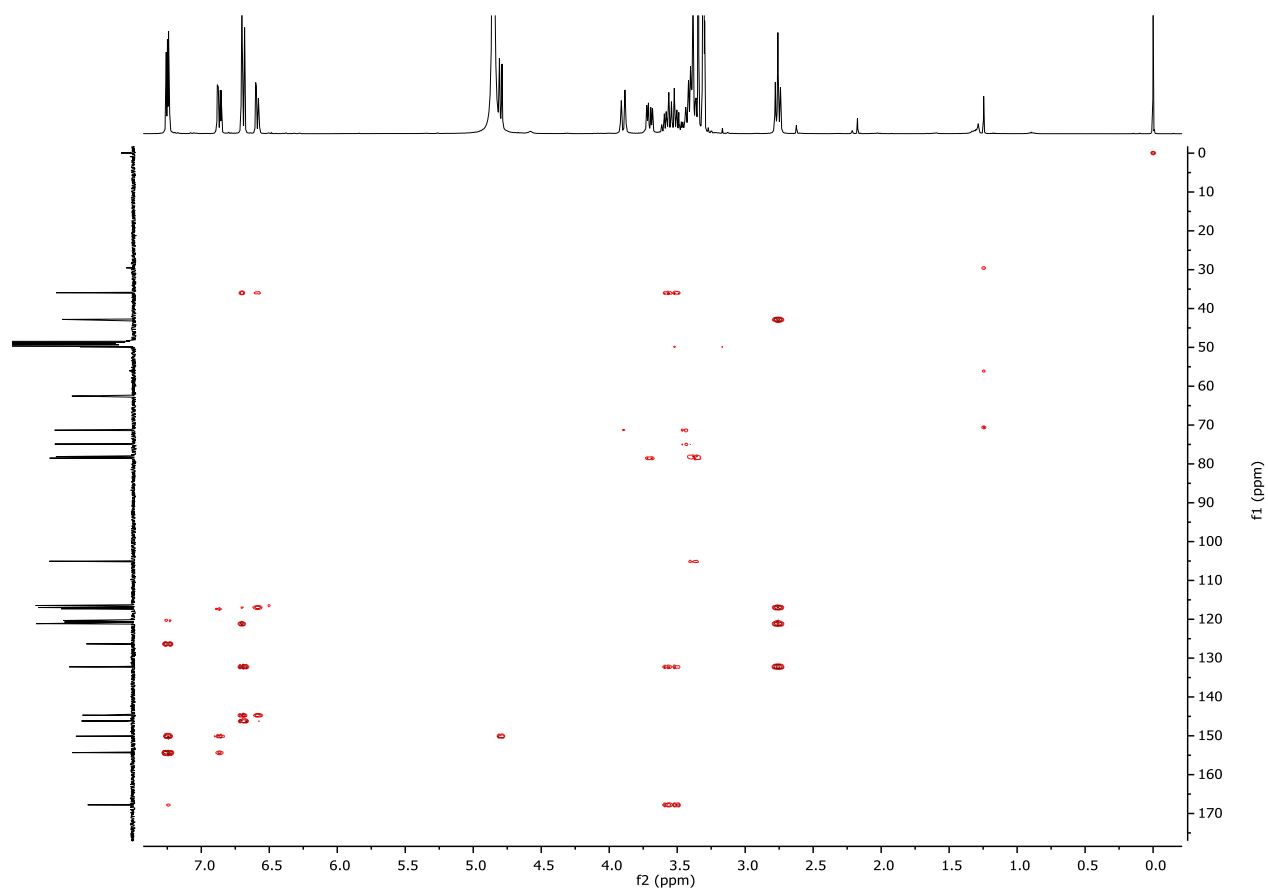

Figure S14: HMBC spectrum of compound 2 (400 MHz, MeOH-*d*<sub>4</sub>).

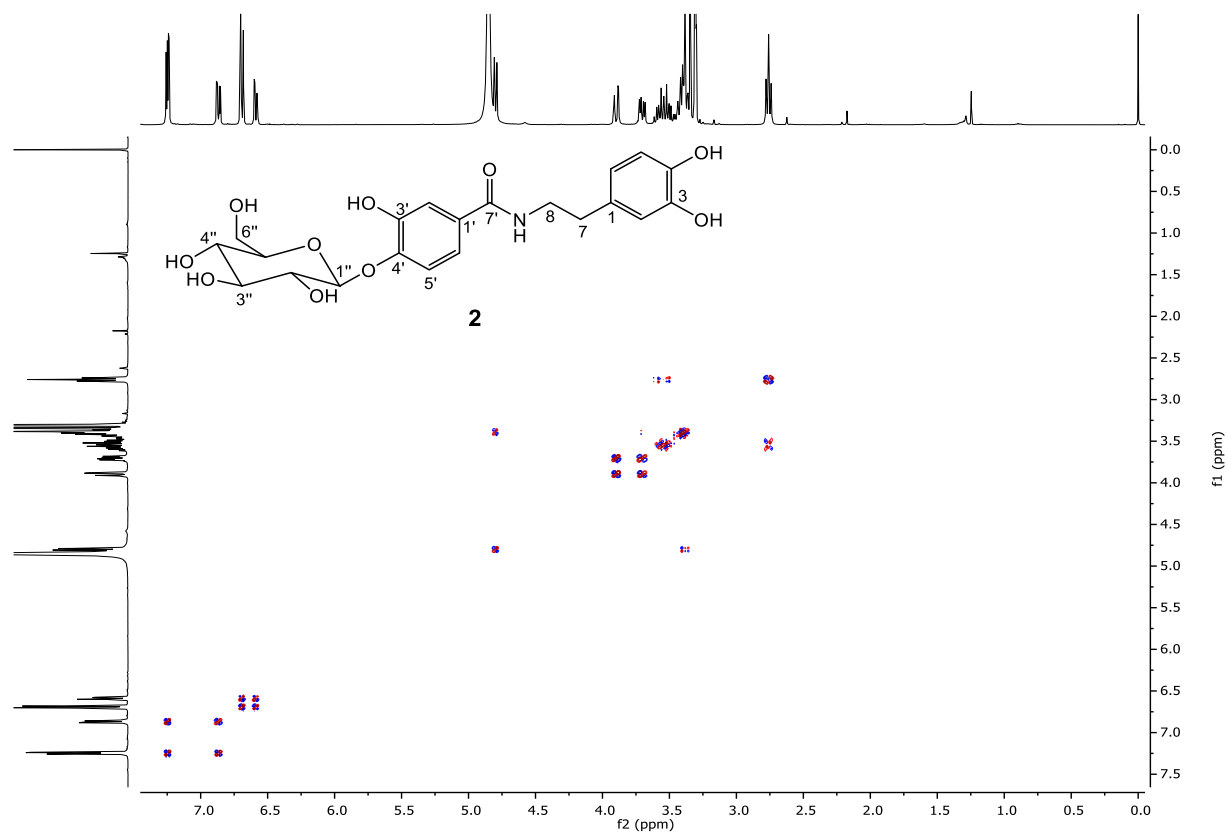

Figure S15: <sup>1</sup>H-<sup>1</sup>H COSY spectrum of compound 2 (400 MHz, MeOH-*d*<sub>4</sub>).

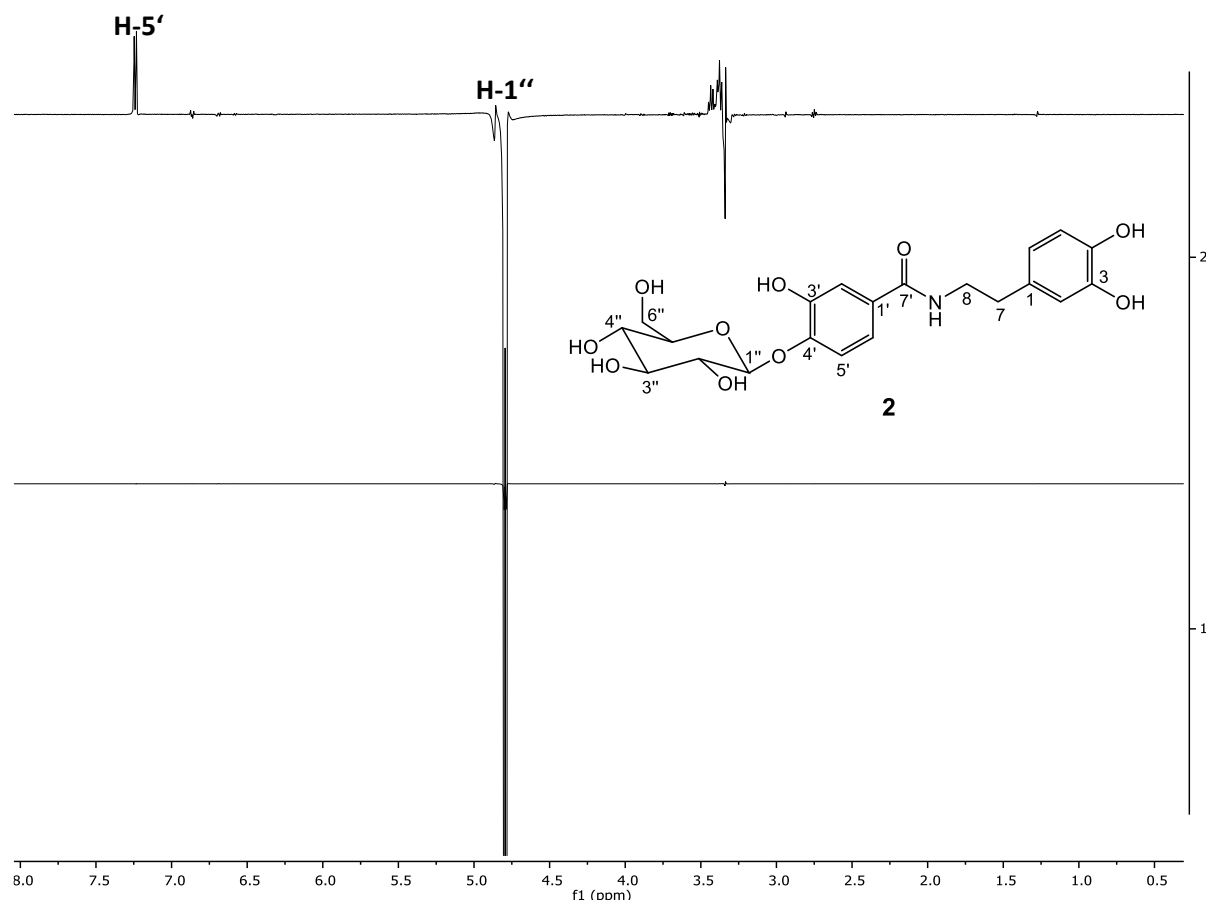

Figure S16: 1D-ROESY spectrum of compound 2 (400 MHz, MeOH-*d*<sub>4</sub>).

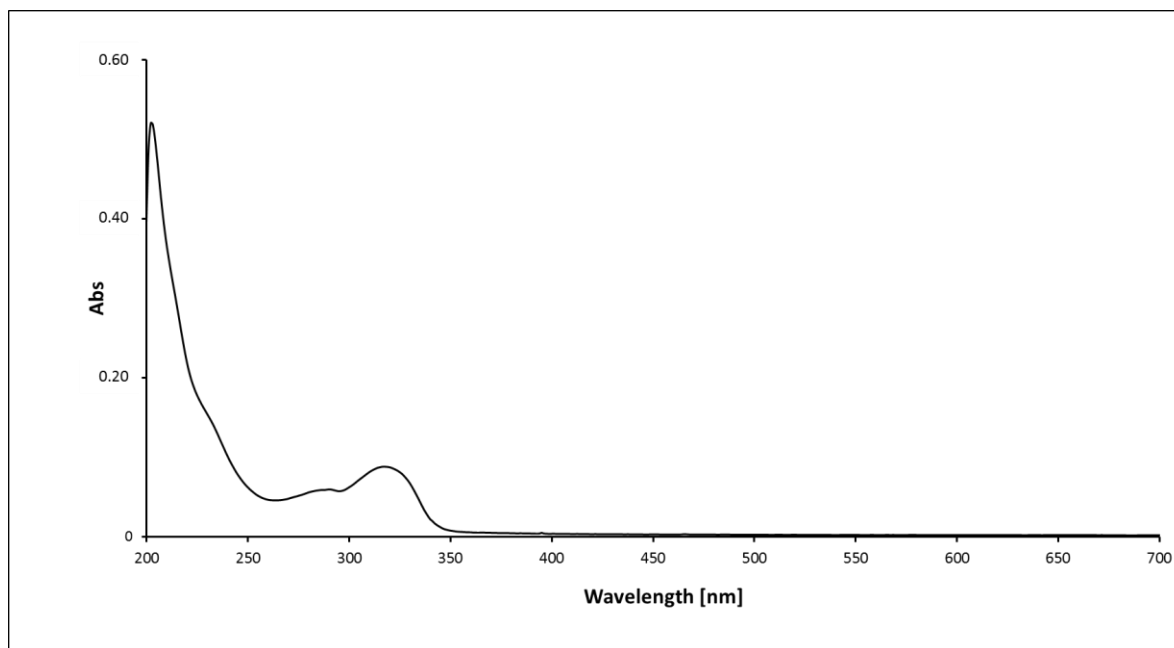

Figure S17: UV spectrum of compound 2 in MeOH.

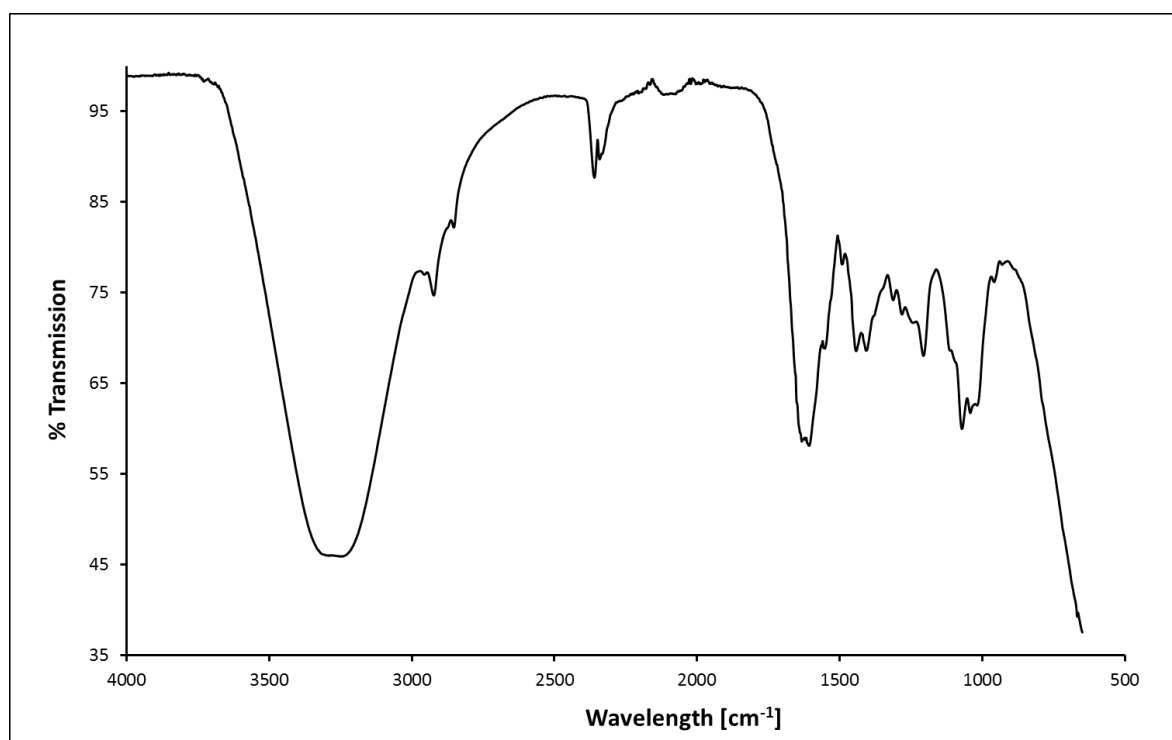

Figure S18: IR spectrum of compound **2** in MeOH.

ISW012\_11\_rt\_9\_neg #54 RT: 0.22 AV: 1 NL: 3.13E6  
T: FTMS - p ESI Full ms [50.00-2000.00]

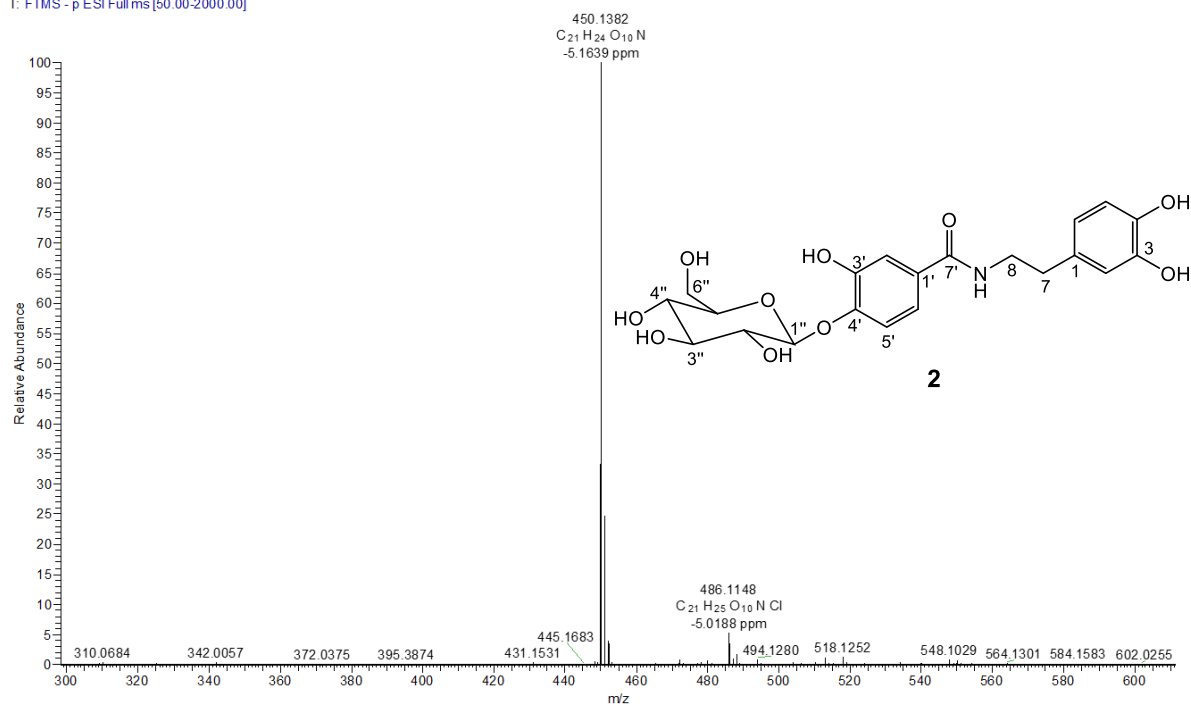

Figure S19: ESI-HRMS spectrum of compound **2** in negative ion mode.

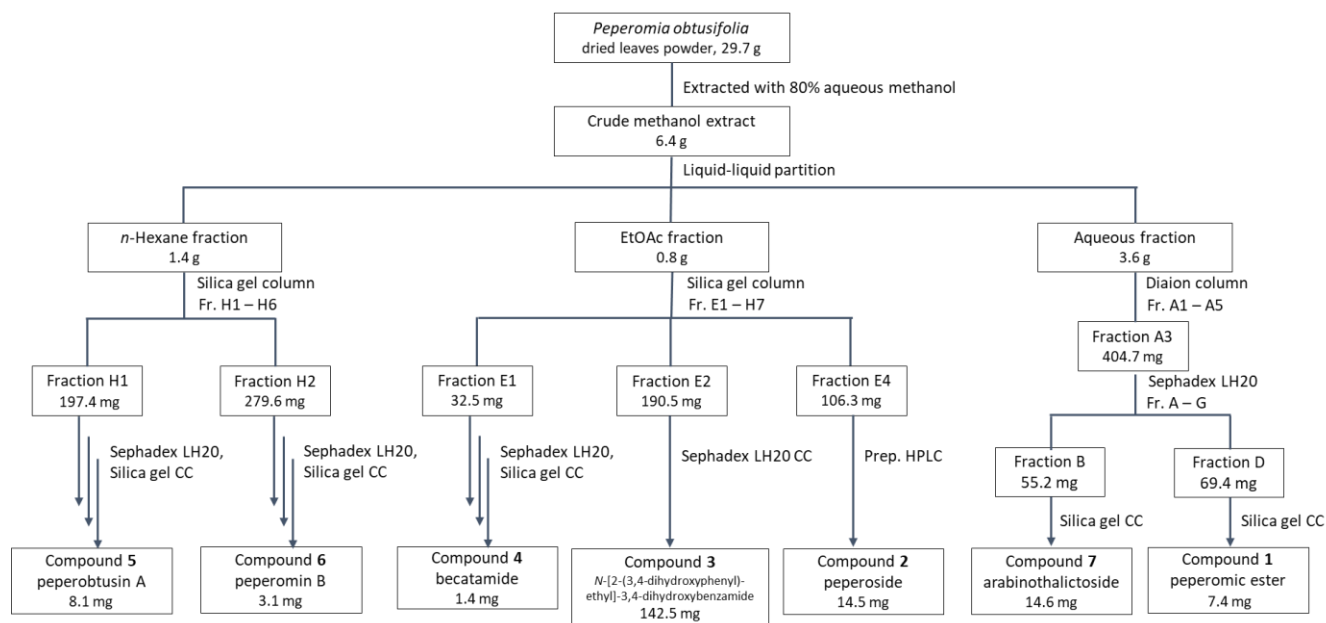

**Figure S20:** Isolation scheme for compounds 1-7.
